# Supplementary material
Source: PubMed Central journal article supplement (PMC3214918)
Supplement: pan0010-0505-s01.pdf [file pan0010-0505-s01.pdf]

**Supplemental Table 1: The sequence of human, mouse, and rat primers used in the characterization of hepatic and pancreatic stellate cells.**

| <b>Human Primers</b>                                   | <b>Symbol</b>  | <b>Forward</b>        | <b>Reverse</b>        |
|--------------------------------------------------------|----------------|-----------------------|-----------------------|
| <i>desmin</i>                                          | <i>DES</i>     | tgaagggcactaacgattcc  | ctcagaacccttgctcag    |
| <i>glial fibrillary acidic protein</i>                 | <i>GFAP</i>    | ccagttgcagtcctgacct   | atctccacggtctcaccac   |
| <i>smooth muscle actin, alpha 2</i>                    | <i>ACTA2</i>   | ctgtccagccatcctcat    | gctggaaggtggacagagag  |
| <i>collagen, type I, alpha 1</i>                       | <i>COL1A1</i>  | agccagcagatcgagaacat  | tctgtccttgggttcttg    |
| <i>collagen, type II, alpha 1</i>                      | <i>COL2A1</i>  | gtctaccccaatccagcaaa  | cttcagggcagtgtagtga   |
| <i>vimentin</i>                                        | <i>VIM</i>     | gtaccggagacaggtgcagt  | tccagcagcttctgtaggt   |
| <i>laminin, alpha 1</i>                                | <i>LAMA1</i>   | aatggtgctggcaggataac  | ccaggacaggaatgaaggaa  |
| <i>nestin</i>                                          | <i>NES</i>     | tagtcccagagaggggaat   | cccacttctcagactgctc   |
| <i>hypoxanthine guanine phosphoribosyl transferase</i> | <i>HPRT</i>    | gaccagtcaacaggggacat  | cctgaccaaggaaagcaaag  |
|                                                        |                |                       |                       |
| <b>Rat Primers</b>                                     |                |                       |                       |
| <i>desmin</i>                                          | <i>DES</i>     | acctcgcgagattgatgctct | aaggtctggatcggaaaggtt |
| <i>glial glial fibrillary acidic protein</i>           | <i>GFAP</i>    | ccaagttgcagacctcaca   | atggtgatgcggttttcttc  |
| <i>smooth muscle actin, alpha 2</i>                    | <i>ACTA2</i>   | tgtgctatgctgctctggac  | cttctgcatcctgtagcaa   |
| <i>collagen, type I, alpha 1</i>                       | <i>COL1A1</i>  | gagcggagagtactggatcg  | gcagggactcttgaggttg   |
| <i>collagen, type II, alpha 1</i>                      | <i>COL2A1</i>  | ttctgcaacatggagactgg  | cttcagggcagtgtagtga   |
| <i>vimentin</i>                                        | <i>VIM</i>     | acgagtaccggagacaggtg  | tccagcagcttctgtaggt   |
| <i>laminin, alpha 1</i>                                | <i>LAMA1</i>   | ggccttctgctcactacag   | gagagttctggtggctctgg  |
| <i>nestin</i>                                          | <i>NES</i>     | ttctcaaagtgggatctgg   | cccacttctcctcatca     |
| <i>hypoxanthine guanine phosphoribosyl transferase</i> | <i>HPRT</i>    | tcccagcgtcgtgattagtg  | cagagggccacaatgtagt   |
|                                                        |                |                       |                       |
| <b>Mouse Primers</b>                                   |                |                       |                       |
| <i>desmin</i>                                          | <i>DES</i>     | tacacctcgcgagattgatgc | gtagcctcgtgacaacctc   |
| <i>glial fibrillary acidic protein</i>                 | <i>GFAP</i>    | cacgaacgagtccttagagc  | ccttctgacacggatttgg   |
| <i>smooth muscle actin, alpha 2</i>                    | <i>ACTA2</i>   | ctgagcgtggctattccttc  | cttctgcatcctgtagcaa   |
| <i>collagen, type I, alpha 1</i>                       | <i>COL1A1</i>  | gagcggagagtactggatcg  | ccttcttgaggttgccagtc  |
| <i>collagen, type II, alpha 1</i>                      | <i>COL2A1</i>  | acactggaagtggggcaag   | tctgccagttcaggtctct   |
| <i>vimentin</i>                                        | <i>VIM</i>     | acgaataccggagacaggtg  | tccagcagcttctgtaggt   |
| <i>laminin, alpha 1</i>                                | <i>LAMA1</i>   | cggatatgcagctctgtca   | cttttggggcttgaggtgt   |
| <i>nestin</i>                                          | <i>NES</i>     | agagaggggacctggaacat  | catcctcccattcactgct   |
| <i>hypoxanthine guanine phosphoribosyl transferase</i> | <i>HPRT</i>    | aagcttgcctggtgaaaagga | ttgcgctcatcttagcctt   |
|                                                        |                |                       |                       |
| <i>large T antigen</i>                                 | <i>SV40gp6</i> | ggtgggttaaaggagcatga  | caactccagccatcattct   |
